# Supplementary material for: Benchmarking metagenomics classifiers on ancient viral DNA: a simulation study
Source: PeerJ journal article supplement (doi:10.7717/peerj.12784), 2022-03-24

# Classification

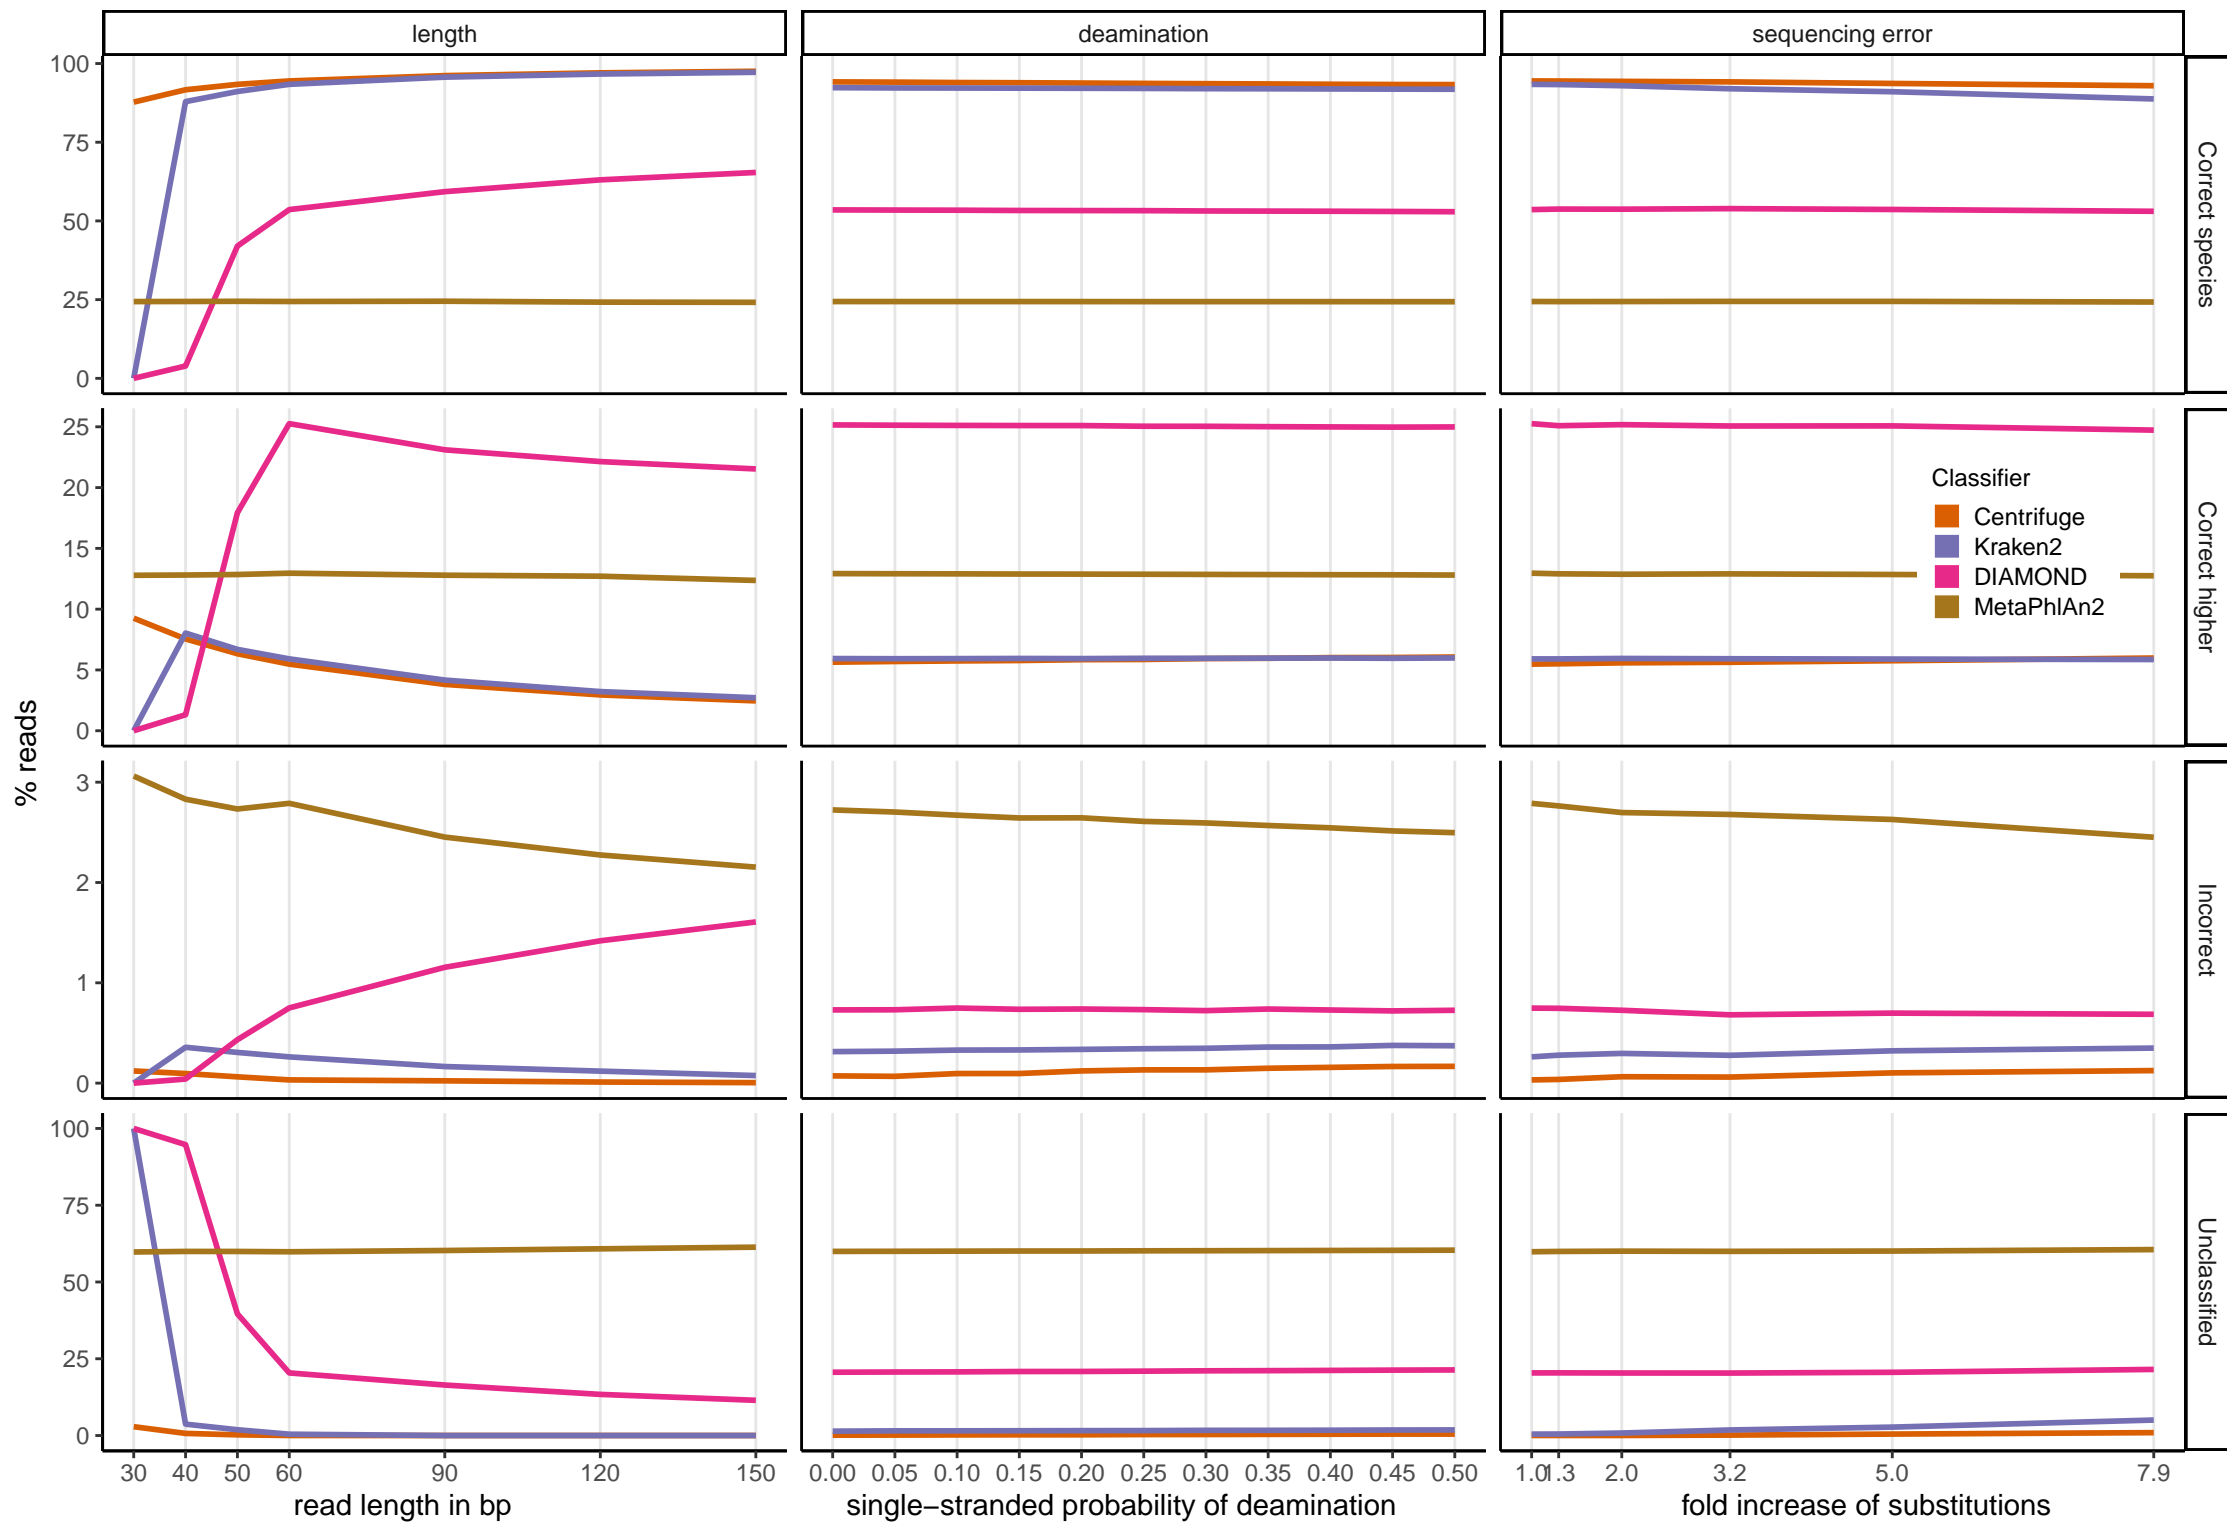

Supplement: figure_S03_all_classification.pdf [file figure_S03_all_classification.pdf]
