# Supplementary material for: Benchmarking metagenomics classifiers on ancient viral DNA: a simulation study
Source: PubMed Central journal article supplement (PMC8958974; doi:10.7717/peerj.12784), 2022-03-24

# Classifier

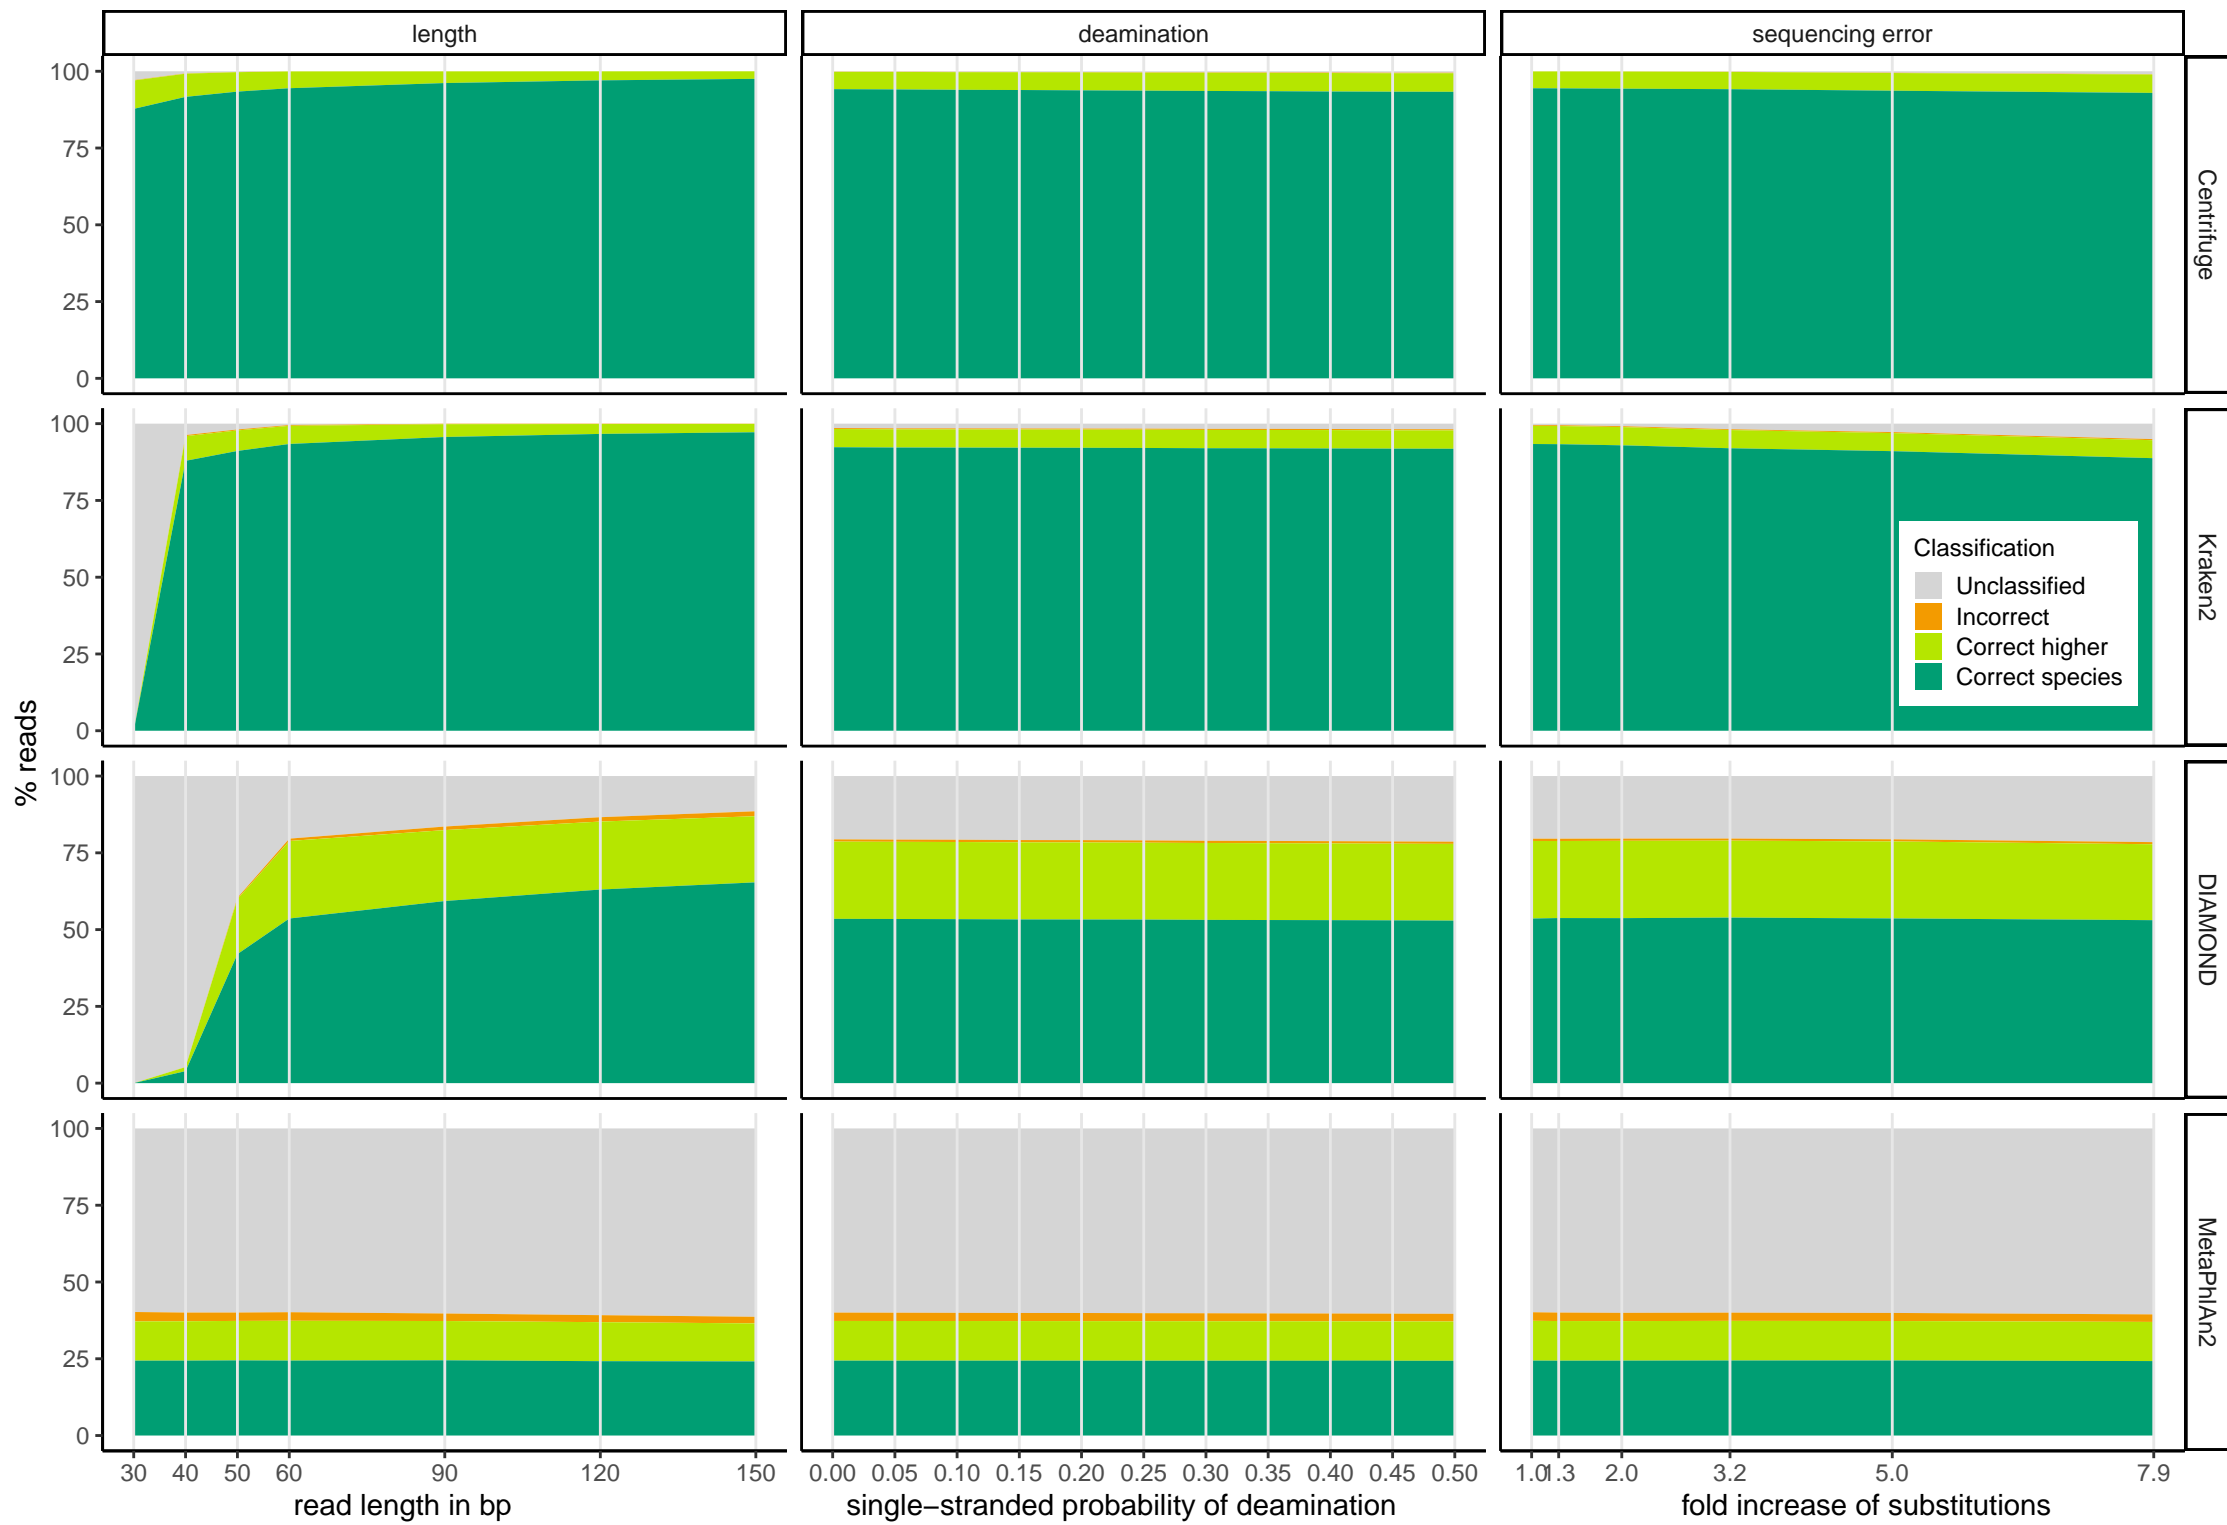

Supplement: peerj-10-12784-s005.pdf [file peerj-10-12784-s005.pdf]
